# Supplementary material for: Photoinduced self-assembly of carboxylic acid-terminated lamellar silsesquioxane: highly functional films for attaching and patterning amino-based ligands
Source: Royal Society of Chemistry journal article supplement (doi:10.1039/c5ra04300j), 2015-01-01
Supplement: c5ra04300j1.pdf [file c5ra04300j1.pdf]

## Electronic Supplementary Information

# Photoinduced Self-assembly of Carboxylic Acid-Terminated Lamellar Silsesquioxane: Highly Functional Films for Attaching and Patterning Amino-based Ligands

Lingli Ni,<sup>\*ad</sup> Abraham Chemtob,<sup>\*a</sup> Céline Croutxé-Barghorn,<sup>a</sup> Céline Dietlin,<sup>b</sup> Jocelyne Brendlé,<sup>b</sup> Séverinne Rigolet,<sup>b</sup> Loïc Vidal,<sup>b</sup> Alain Dieterlen,<sup>c</sup> Elie Maalouf,<sup>c</sup> and Olivier Haerberlé<sup>c</sup>

<sup>a</sup> Laboratory of Photochemistry and Macromolecular Engineering, ENSCMu, University of Haute-Alsace, 3 bis rue Alfred Werner 68093 Mulhouse Cedex, France.

<sup>b</sup> Institute of Material Science of Mulhouse, CNRS, UMR 7361, University of Haute-Alsace, 3 bis rue Alfred Werner 68093 Mulhouse Cedex, France.

<sup>c</sup> Laboratory of Modelling, Intelligence, Process and Systems, ENSISA, University of Haute-Alsace, 61 rue Albert Camus, 68093 Mulhouse Cedex, France.

<sup>d</sup> Key Laboratory for Palygorskite Science and Applied Technology of Jiangsu Province, College of Bioengineering and Chemical Engineering, Huaiyin Institute of Technology, Huaian 223003, People's Republic of China.

\*Corresponding authors:

Dr. Abraham Chemtob; e-mail: [abraham.chemtob@uha.fr](mailto:abraham.chemtob@uha.fr); Tel: +33 3 8933 5030; Fax: +33 3 8933 5017.

Dr. Lingli Ni; e-mail: [nilingli520@126.com](mailto:nilingli520@126.com); Tel: +86 517 83559056; Fax: +86 517 83559056.

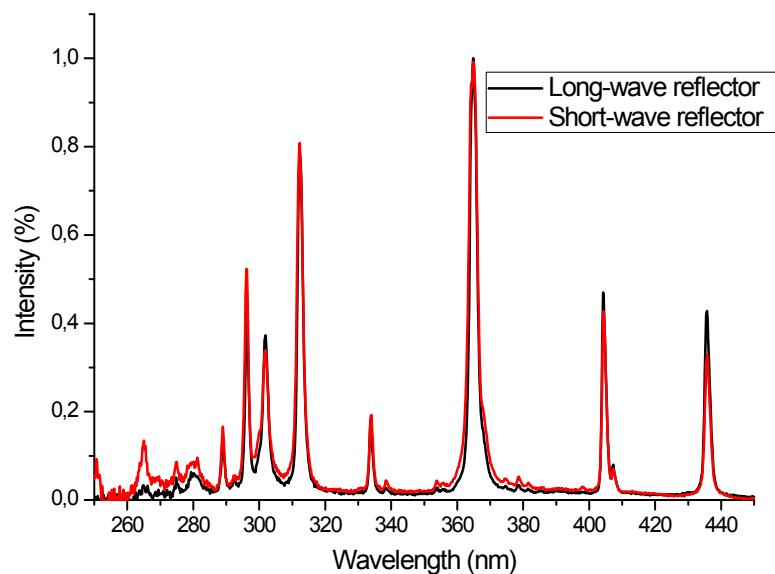

**Figure S1.** UV spectra of the medium-pressure Hg-Xe lamp with a short wave and a long wave reflectors at 254 nm and 365 nm, respectively.

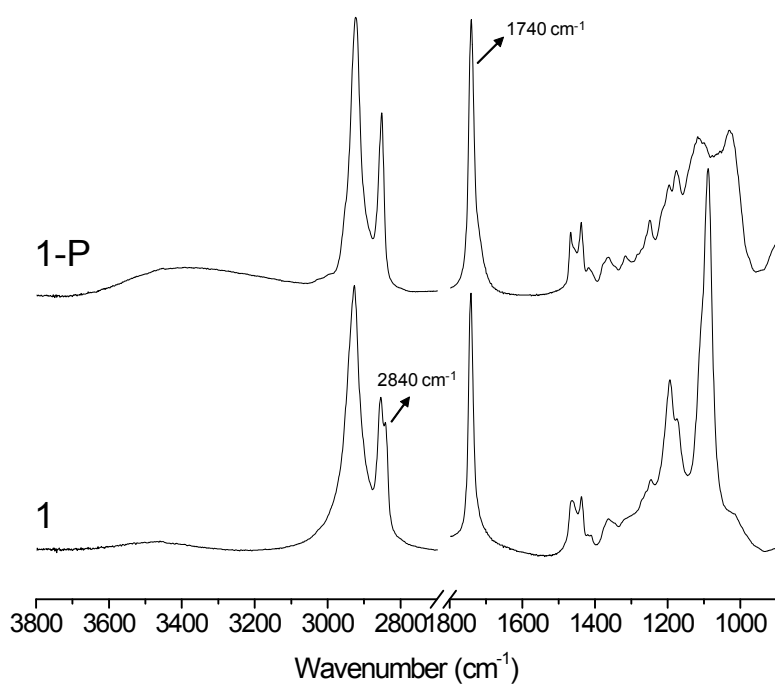

**Figure S2.** FTIR spectra of the precursor **1** and the nanocomposite film **1-P** obtained after UV irradiation

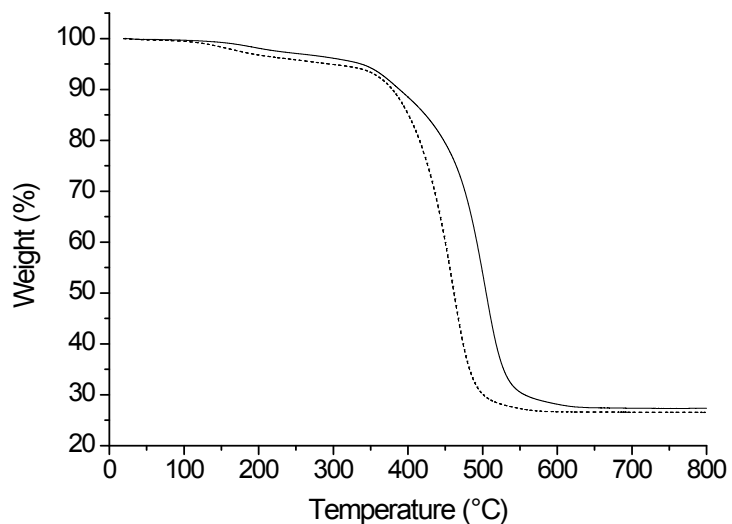

**Figure S3.** TGA thermograms of **1-P** (---) and **1-PH** (—) samples.

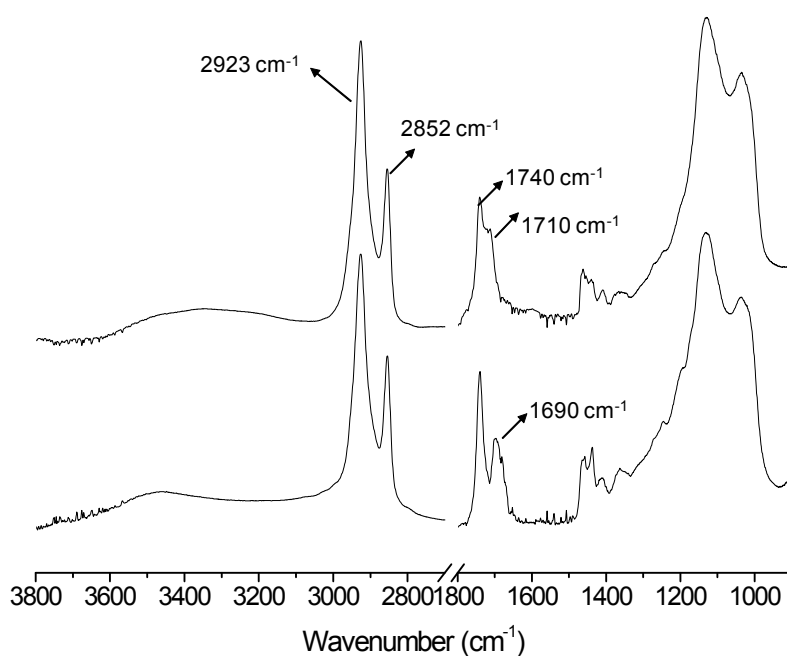

**Figure S4.** FTIR spectra of **1-PHL** film before (down) and after (up) photodegradation.

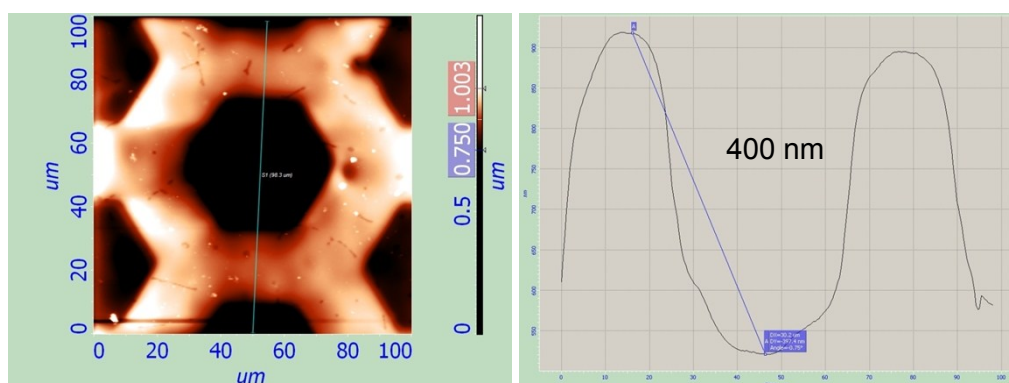

**Figure S5.** AFM 2D surface image of the photopatterned **1-PHL** film (left) and depth profile along the line drawn in the image (right).
